# Supplementary material for: Dual nature of the excited state in organic–inorganic lead halide perovskites
Source: Royal Society of Chemistry journal article supplement (doi:10.1039/c4ee02988g), 2014-11-03
Supplement: c4ee02988g1.pdf [file c4ee02988g1.pdf]

## Supporting Information

### Dual Nature of the Excited State in Organic-Inorganic Lead Halide Perovskites

Kevin G. Stamplecoskie<sup>1</sup>, Joseph S. Manser<sup>2</sup>, and Prashant V. Kamat<sup>\*,1,2</sup>

Radiation Laboratory  
University of Notre Dame  
Notre Dame, Indiana 46556, United States

---

<sup>1</sup> Department of Chemistry and Biochemistry, University of Notre Dame, Notre Dame, Indiana 46556, United States

<sup>2</sup> Department of Chemical and Biomolecular Engineering, University of Notre Dame, Notre Dame, Indiana 46556, United States

\*Corresponding author: Prashant V. Kamat (pkamat@nd.edu)

## Experimental Details

*Methylammonium iodide synthesis.*  $\text{CH}_3\text{NH}_3\text{I}$  was synthesized by dropwise addition of aqueous HI (Alfa Aesar, 57%) into methylamine (Sigma Aldrich, aqueous, 40%) under stirring at 0 °C. After allowing the solution to stir for two hours, the solvent was removed by rotary evaporation. The yellow-white crystals were washed three times by sonication in diethyl ether, filtered, and dried overnight under vacuum to yield white crystals of  $\text{CH}_3\text{NH}_3\text{I}$ .

*$\text{CH}_3\text{NH}_3\text{PbI}_3$  film preparation for optical measurements.* Borosilicate glass slides were rinsed with detergent, sonicated in ethanol for 15 min, and subjected to oxygen plasma treatment for 5 min prior to mesoporous alumina deposition. Alumina films were cast onto the clean glass slides by spin coating a 4 wt% colloidal suspension of  $\text{Al}_2\text{O}_3$  in 2-propanol (Sigma Aldrich, 20 wt% in 2-propanol, <50 nm) at 5000 rpm for 30 s (2000 rpm/s ramp rate). The films were then dried at 150 °C for 1 h. The  $\text{CH}_3\text{NH}_3\text{PbI}_3$  precursor solution was prepared by dissolving stoichiometric quantities of  $\text{CH}_3\text{NH}_3\text{I}$  and  $\text{PbI}_2$  (Alfa Aesar, 99.9985%) in *N,N*-dimethylformamide at 150 mg/ml to obtain the desired optical density for transmittance measurements. The yellow-colored solution was stirred at 70 °C for 1 h prior to perovskite film deposition. The precursor solution was loaded onto the alumina films and spin cast at 2000 rpm for 30 s (1000 rpm/s ramp rate). For the as-deposited samples, no further treatment was carried out, while for the annealed samples, the films were placed on a hot plate at 100 °C for 20 min to form the dark brown  $\text{CH}_3\text{NH}_3\text{PbI}_3$  perovskite. Perovskite film deposition and annealing were carried out in a dry nitrogen atmosphere ( $\leq 10$  ppm  $\text{H}_2\text{O}$ ).

*Optical characterization.* For steady-state absorption spectra of solutions and films, a Cary 50 UV-vis absorption spectrometer was used. Transient absorption measurements were performed using a Clark laser with a 775 nm fundamental pulsed at 1 kHz with 130 fs FWHM pulse durations. The fundamental is split to generate a white light probe by focusing through a Ti-sapphire crystal. For 387 nm excitation, the second harmonic of the 775 nm is generated and used to excite samples. Transient absorption spectra are recorded as a difference between probe signals with/without a pump pulse, and the delay between pump and probe is controlled to generate spectra at varied times following excitation. For optical characterization of solid-

state samples, the as-deposited and annealed films were placed in sealable quartz cuvettes and evacuated for at least 30 min prior to all measurements.

*Structural characterization.* A Bruker D8 Advance Davinci powder X-ray diffractometer was used to record diffraction patterns of the precursor powder and thin film samples. For measurement of the precursor components, CH<sub>3</sub>NH<sub>3</sub>I and PbI<sub>2</sub> powders were deposited on quartz substrates. Thin film samples were prepared by depositing a 400 mg/ml stoichiometric precursor solution of CH<sub>3</sub>NH<sub>3</sub>I and PbI<sub>2</sub> in *N,N*-dimethylformamide onto a mesoporous alumina substrate. Processing of the thin film samples for structural characterization was done in the same manner as the optical samples detailed above.

### **Details of Kinetic Analysis**

A biexponential equation of the form  $y = y_0 + A_1 \exp(-x/\tau_1) + A_2 \exp(-x/\tau_2)$  was used to fit the normalized excited state decay kinetics of the solution and solid-state samples. The coefficients  $A_1$  and  $A_2$  represent the weighted contribution of each exponential component to the overall kinetics, and  $\tau_1$  and  $\tau_2$  are the time constants of the two exponential decay elements. The average lifetime at the specified spectral position for film samples was calculated using the equation  $\langle \tau \rangle = A_1 \tau_1 + A_2 \tau_2$ .

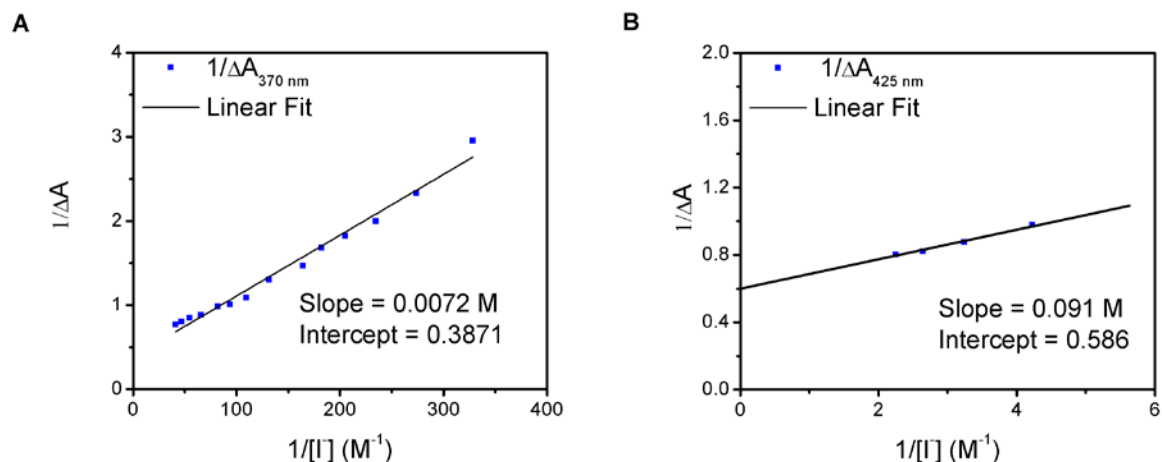

Figure S1. Benesi-Hildebrandt plot for obtaining the association constant for iodine ions with  $Pb^{2+}$ , monitored at 370 nm (A) and 425 nm (B) for each of the corresponding plumbate complexes.

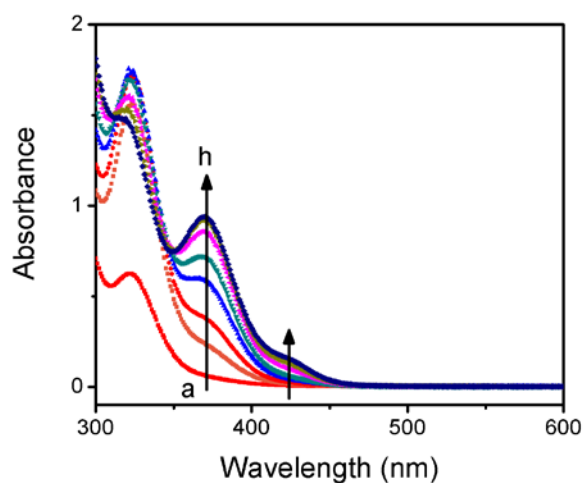

Figure S2. Absorption spectra of 200  $\mu M$   $PbI_2$  in dimethylformamide with increasing potassium iodide concentrations of, a) 0 mM, b) 3.7 mM, c) 7.5 mM, d) 15 mM, e) 22 mM, f) 37 mM, g) 52 mM and h) 67 mM.

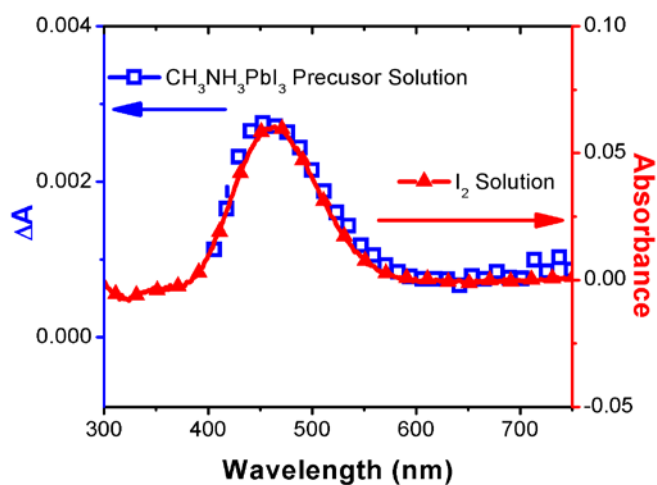

Figure S3. Transient absorption spectrum of  $\text{CH}_3\text{NH}_3\text{PbI}_3$  precursor solution after 387 nm femtosecond pulsed excitation, overlapped with an absorption spectrum of  $\text{I}_2$  in dimethylformamide.

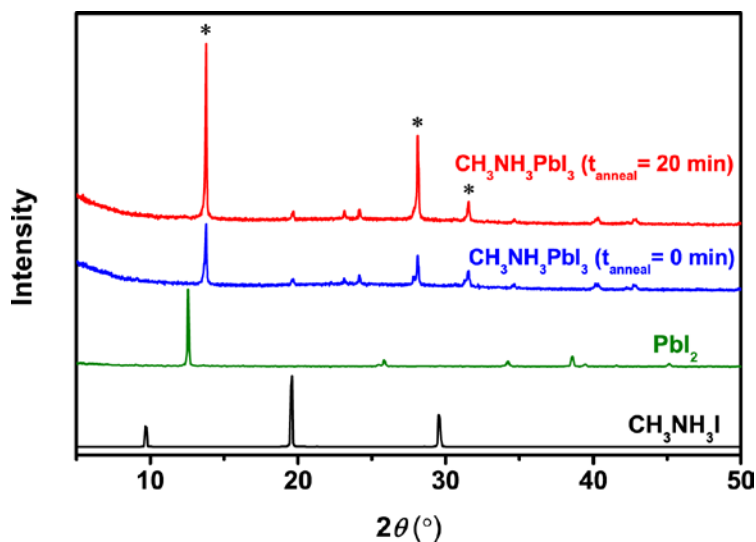

Figure S4. XRD spectra of the precursor powders  $\text{CH}_3\text{NH}_3\text{I}$  (black trace) and  $\text{PbI}_2$  (green trace), along with spectra of the as-deposited perovskite film on alumina scaffold before annealing (blue trace) and after 20 minutes of annealing at 100 °C (red trace). \* indicates prominent reflections of the tetragonal phase of  $\text{CH}_3\text{NH}_3\text{PbI}_3$  at  $2\theta = 13.8^\circ$ ,  $28.1^\circ$ , and  $31.6^\circ$ .

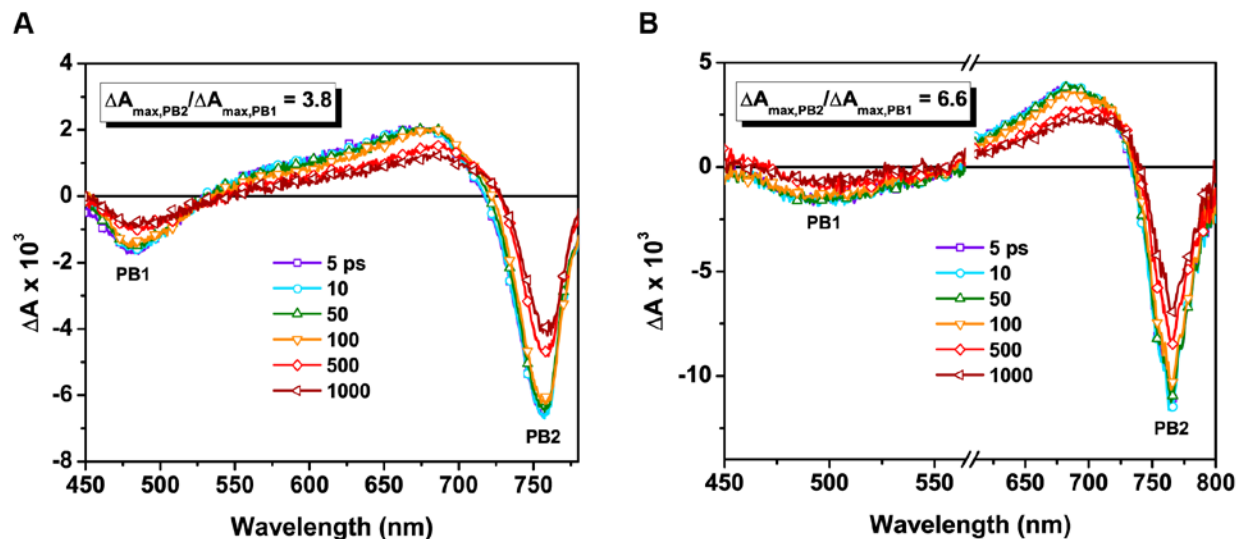

Figure S5. Comparison of the ratio of the photoinduced bleaches (PB1 and PB2) in the  $\text{CH}_3\text{NH}_3\text{PbI}_3$  excited state spectrum following (A) 387 nm and (B) 590 nm femtosecond pulsed laser excitation. The larger PB2/PB1 bleaching ratio with the 590 nm pump pulse demonstrates increased excitation of the lower energy transition. Pump power in both measurements was  $1.5 \text{ mW/cm}^2$ .
